# Supplementary material
Source: ML conference proceedings conference paper supplement (https://www.ecva.net/papers/eccv_2020/papers_ECCV/html/123630766_ECCV_2020_paper.php)
Supplement: Supplementary file 2 [file 123630766-supp.zip]

Archive with 9,069 entries (9,048 files):
- 3128 supplementary materials/
- 3128 supplementary materials/appendix.pdf
- 3128 supplementary materials/DEMO_MBNet.mp4
- 3128 supplementary materials/MBNet_detections/
- 3128 supplementary materials/MBNet_detections/bbGt.m
- 3128 supplementary materials/MBNet_detections/demo_test.m
- 3128 supplementary materials/MBNet_detections/getPrmDflt.m
- 3128 supplementary materials/MBNet_detections/GroudTruth_gt/
- 3128 supplementary materials/MBNet_detections/GroudTruth_gt/gt_day.mat
- 3128 supplementary materials/MBNet_detections/GroudTruth_gt/gt_far.mat
- 3128 supplementary materials/MBNet_detections/GroudTruth_gt/gt_heavy.mat
- 3128 supplementary materials/MBNet_detections/GroudTruth_gt/gt_medium.mat
- 3128 supplementary materials/MBNet_detections/GroudTruth_gt/gt_near.mat
- 3128 supplementary materials/MBNet_detections/GroudTruth_gt/gt_night.mat
- 3128 supplementary materials/MBNet_detections/GroudTruth_gt/gt_none.mat
- 3128 supplementary materials/MBNet_detections/GroudTruth_gt/gt_partial.mat
- 3128 supplementary materials/MBNet_detections/GroudTruth_gt/gt_reasonable.mat
- 3128 supplementary materials/MBNet_detections/improve_annotations_liu/
- 3128 supplementary materials/MBNet_detections/improve_annotations_liu/test-all/
- 3128 supplementary materials/MBNet_detections/improve_annotations_liu/test-all/annotations_KAIST_test_set/
- 3128 supplementary materials/MBNet_detections/improve_annotations_liu/test-all/annotations_KAIST_test_set/set06_V000_I00019.txt
- 3128 supplementary materials/MBNet_detections/improve_annotations_liu/test-all/annotations_KAIST_test_set/set06_V000_I00039.txt
- 3128 supplementary materials/MBNet_detections/improve_annotations_liu/test-all/annotations_KAIST_test_set/set06_V000_I00059.txt
- 3128 supplementary materials/MBNet_detections/improve_annotations_liu/test-all/annotations_KAIST_test_set/set06_V000_I00079.txt
- 3128 supplementary materials/MBNet_detections/improve_annotations_liu/test-all/annotations_KAIST_test_set/set06_V000_I00099.txt
- 3128 supplementary materials/MBNet_detections/improve_annotations_liu/test-all/annotations_KAIST_test_set/set06_V000_I00119.txt
- 3128 supplementary materials/MBNet_detections/improve_annotations_liu/test-all/annotations_KAIST_test_set/set06_V000_I00139.txt
- 3128 supplementary materials/MBNet_detections/improve_annotations_liu/test-all/annotations_KAIST_test_set/set06_V000_I00159.txt
- 3128 supplementary materials/MBNet_detections/improve_annotations_liu/test-all/annotations_KAIST_test_set/set06_V000_I00179.txt
- 3128 supplementary materials/MBNet_detections/improve_annotations_liu/test-all/annotations_KAIST_test_set/set06_V000_I00199.txt
- 3128 supplementary materials/MBNet_detections/improve_annotations_liu/test-all/annotations_KAIST_test_set/set06_V000_I00219.txt
- 3128 supplementary materials/MBNet_detections/improve_annotations_liu/test-all/annotations_KAIST_test_set/set06_V000_I00239.txt
- 3128 supplementary materials/MBNet_detections/improve_annotations_liu/test-all/annotations_KAIST_test_set/set06_V000_I00259.txt
- 3128 supplementary materials/MBNet_detections/improve_annotations_liu/test-all/annotations_KAIST_test_set/set06_V000_I00279.txt
- 3128 supplementary materials/MBNet_detections/improve_annotations_liu/test-all/annotations_KAIST_test_set/set06_V000_I00299.txt
- 3128 supplementary materials/MBNet_detections/improve_annotations_liu/test-all/annotations_KAIST_test_set/set06_V000_I00319.txt
- 3128 supplementary materials/MBNet_detections/improve_annotations_liu/test-all/annotations_KAIST_test_set/set06_V000_I00339.txt
- 3128 supplementary materials/MBNet_detections/improve_annotations_liu/test-all/annotations_KAIST_test_set/set06_V000_I00359.txt
- 3128 supplementary materials/MBNet_detections/improve_annotations_liu/test-all/annotations_KAIST_test_set/set06_V000_I00379.txt
- 3128 supplementary materials/MBNet_detections/improve_annotations_liu/test-all/annotations_KAIST_test_set/set06_V000_I00399.txt
- 3128 supplementary materials/MBNet_detections/improve_annotations_liu/test-all/annotations_KAIST_test_set/set06_V000_I00419.txt
- 3128 supplementary materials/MBNet_detections/improve_annotations_liu/test-all/annotations_KAIST_test_set/set06_V000_I00439.txt
- 3128 supplementary materials/MBNet_detections/improve_annotations_liu/test-all/annotations_KAIST_test_set/set06_V000_I00459.txt
- 3128 supplementary materials/MBNet_detections/improve_annotations_liu/test-all/annotations_KAIST_test_set/set06_V000_I00479.txt
- 3128 supplementary materials/MBNet_detections/improve_annotations_liu/test-all/annotations_KAIST_test_set/set06_V000_I00499.txt
- 3128 supplementary materials/MBNet_detections/improve_annotations_liu/test-all/annotations_KAIST_test_set/set06_V000_I00519.txt
- 3128 supplementary materials/MBNet_detections/improve_annotations_liu/test-all/annotations_KAIST_test_set/set06_V000_I00539.txt
- 3128 supplementary materials/MBNet_detections/improve_annotations_liu/test-all/annotations_KAIST_test_set/set06_V000_I00559.txt
- 3128 supplementary materials/MBNet_detections/improve_annotations_liu/test-all/annotations_KAIST_test_set/set06_V000_I00579.txt
- 3128 supplementary materials/MBNet_detections/improve_annotations_liu/test-all/annotations_KAIST_test_set/set06_V000_I00599.txt
- 3128 supplementary materials/MBNet_detections/improve_annotations_liu/test-all/annotations_KAIST_test_set/set06_V000_I00619.txt
- 3128 supplementary materials/MBNet_detections/improve_annotations_liu/test-all/annotations_KAIST_test_set/set06_V000_I00639.txt
- 3128 supplementary materials/MBNet_detections/improve_annotations_liu/test-all/annotations_KAIST_test_set/set06_V000_I00659.txt
- 3128 supplementary materials/MBNet_detections/improve_annotations_liu/test-all/annotations_KAIST_test_set/set06_V000_I00679.txt
- 3128 supplementary materials/MBNet_detections/improve_annotations_liu/test-all/annotations_KAIST_test_set/set06_V000_I00699.txt
- 3128 supplementary materials/MBNet_detections/improve_annotations_liu/test-all/annotations_KAIST_test_set/set06_V000_I00719.txt
- 3128 supplementary materials/MBNet_detections/improve_annotations_liu/test-all/annotations_KAIST_test_set/set06_V000_I00739.txt
- 3128 supplementary materials/MBNet_detections/improve_annotations_liu/test-all/annotations_KAIST_test_set/set06_V000_I00759.txt
- 3128 supplementary materials/MBNet_detections/improve_annotations_liu/test-all/annotations_KAIST_test_set/set06_V000_I00779.txt
- 3128 supplementary materials/MBNet_detections/improve_annotations_liu/test-all/annotations_KAIST_test_set/set06_V000_I00799.txt
- 3128 supplementary materials/MBNet_detections/improve_annotations_liu/test-all/annotations_KAIST_test_set/set06_V000_I00819.txt
- 3128 supplementary materials/MBNet_detections/improve_annotations_liu/test-all/annotations_KAIST_test_set/set06_V000_I00839.txt
- 3128 supplementary materials/MBNet_detections/improve_annotations_liu/test-all/annotations_KAIST_test_set/set06_V000_I00859.txt
- 3128 supplementary materials/MBNet_detections/improve_annotations_liu/test-all/annotations_KAIST_test_set/set06_V000_I00879.txt
- 3128 supplementary materials/MBNet_detections/improve_annotations_liu/test-all/annotations_KAIST_test_set/set06_V000_I00899.txt
- 3128 supplementary materials/MBNet_detections/improve_annotations_liu/test-all/annotations_KAIST_test_set/set06_V000_I00919.txt
- 3128 supplementary materials/MBNet_detections/improve_annotations_liu/test-all/annotations_KAIST_test_set/set06_V000_I00939.txt
- 3128 supplementary materials/MBNet_detections/improve_annotations_liu/test-all/annotations_KAIST_test_set/set06_V000_I00959.txt
- 3128 supplementary materials/MBNet_detections/improve_annotations_liu/test-all/annotations_KAIST_test_set/set06_V000_I00979.txt
- 3128 supplementary materials/MBNet_detections/improve_annotations_liu/test-all/annotations_KAIST_test_set/set06_V000_I00999.txt
- 3128 supplementary materials/MBNet_detections/improve_annotations_liu/test-all/annotations_KAIST_test_set/set06_V000_I01019.txt
- 3128 supplementary materials/MBNet_detections/improve_annotations_liu/test-all/annotations_KAIST_test_set/set06_V000_I01039.txt
- 3128 supplementary materials/MBNet_detections/improve_annotations_liu/test-all/annotations_KAIST_test_set/set06_V000_I01059.txt
- 3128 supplementary materials/MBNet_detections/improve_annotations_liu/test-all/annotations_KAIST_test_set/set06_V000_I01079.txt
- 3128 supplementary materials/MBNet_detections/improve_annotations_liu/test-all/annotations_KAIST_test_set/set06_V000_I01099.txt
- 3128 supplementary materials/MBNet_detections/improve_annotations_liu/test-all/annotations_KAIST_test_set/set06_V000_I01119.txt
- 3128 supplementary materials/MBNet_detections/improve_annotations_liu/test-all/annotations_KAIST_test_set/set06_V000_I01139.txt
- 3128 supplementary materials/MBNet_detections/improve_annotations_liu/test-all/annotations_KAIST_test_set/set06_V000_I01159.txt
- 3128 supplementary materials/MBNet_detections/improve_annotations_liu/test-all/annotations_KAIST_test_set/set06_V000_I01179.txt
- 3128 supplementary materials/MBNet_detections/improve_annotations_liu/test-all/annotations_KAIST_test_set/set06_V000_I01199.txt
- 3128 supplementary materials/MBNet_detections/improve_annotations_liu/test-all/annotations_KAIST_test_set/set06_V000_I01219.txt
- 3128 supplementary materials/MBNet_detections/improve_annotations_liu/test-all/annotations_KAIST_test_set/set06_V000_I01239.txt
- 3128 supplementary materials/MBNet_detections/improve_annotations_liu/test-all/annotations_KAIST_test_set/set06_V000_I01259.txt
- 3128 supplementary materials/MBNet_detections/improve_annotations_liu/test-all/annotations_KAIST_test_set/set06_V000_I01279.txt
- 3128 supplementary materials/MBNet_detections/improve_annotations_liu/test-all/annotations_KAIST_test_set/set06_V000_I01299.txt
- 3128 supplementary materials/MBNet_detections/improve_annotations_liu/test-all/annotations_KAIST_test_set/set06_V000_I01319.txt
- 3128 supplementary materials/MBNet_detections/improve_annotations_liu/test-all/annotations_KAIST_test_set/set06_V000_I01339.txt
- 3128 supplementary materials/MBNet_detections/improve_annotations_liu/test-all/annotations_KAIST_test_set/set06_V000_I01359.txt
- 3128 supplementary materials/MBNet_detections/improve_annotations_liu/test-all/annotations_KAIST_test_set/set06_V000_I01379.txt
- 3128 supplementary materials/MBNet_detections/improve_annotations_liu/test-all/annotations_KAIST_test_set/set06_V000_I01399.txt
- 3128 supplementary materials/MBNet_detections/improve_annotations_liu/test-all/annotations_KAIST_test_set/set06_V000_I01419.txt
- 3128 supplementary materials/MBNet_detections/improve_annotations_liu/test-all/annotations_KAIST_test_set/set06_V000_I01439.txt
- 3128 supplementary materials/MBNet_detections/improve_annotations_liu/test-all/annotations_KAIST_test_set/set06_V000_I01459.txt
- 3128 supplementary materials/MBNet_detections/improve_annotations_liu/test-all/annotations_KAIST_test_set/set06_V000_I01479.txt
- 3128 supplementary materials/MBNet_detections/improve_annotations_liu/test-all/annotations_KAIST_test_set/set06_V000_I01499.txt
- 3128 supplementary materials/MBNet_detections/improve_annotations_liu/test-all/annotations_KAIST_test_set/set06_V000_I01519.txt
- 3128 supplementary materials/MBNet_detections/improve_annotations_liu/test-all/annotations_KAIST_test_set/set06_V001_I00019.txt
- 3128 supplementary materials/MBNet_detections/improve_annotations_liu/test-all/annotations_KAIST_test_set/set06_V001_I00039.txt
- 3128 supplementary materials/MBNet_detections/improve_annotations_liu/test-all/annotations_KAIST_test_set/set06_V001_I00059.txt
- 3128 supplementary materials/MBNet_detections/improve_annotations_liu/test-all/annotations_KAIST_test_set/set06_V001_I00079.txt
- 3128 supplementary materials/MBNet_detections/improve_annotations_liu/test-all/annotations_KAIST_test_set/set06_V001_I00099.txt
- 3128 supplementary materials/MBNet_detections/improve_annotations_liu/test-all/annotations_KAIST_test_set/set06_V001_I00119.txt
- 3128 supplementary materials/MBNet_detections/improve_annotations_liu/test-all/annotations_KAIST_test_set/set06_V001_I00139.txt
- 3128 supplementary materials/MBNet_detections/improve_annotations_liu/test-all/annotations_KAIST_test_set/set06_V001_I00159.txt
- 3128 supplementary materials/MBNet_detections/improve_annotations_liu/test-all/annotations_KAIST_test_set/set06_V001_I00179.txt
- 3128 supplementary materials/MBNet_detections/improve_annotations_liu/test-all/annotations_KAIST_test_set/set06_V001_I00199.txt
- 3128 supplementary materials/MBNet_detections/improve_annotations_liu/test-all/annotations_KAIST_test_set/set06_V001_I00219.txt
- 3128 supplementary materials/MBNet_detections/improve_annotations_liu/test-all/annotations_KAIST_test_set/set06_V001_I00239.txt
- 3128 supplementary materials/MBNet_detections/improve_annotations_liu/test-all/annotations_KAIST_test_set/set06_V001_I00259.txt
- 3128 supplementary materials/MBNet_detections/improve_annotations_liu/test-all/annotations_KAIST_test_set/set06_V001_I00279.txt
- 3128 supplementary materials/MBNet_detections/improve_annotations_liu/test-all/annotations_KAIST_test_set/set06_V001_I00299.txt
- 3128 supplementary materials/MBNet_detections/improve_annotations_liu/test-all/annotations_KAIST_test_set/set06_V001_I00319.txt
- 3128 supplementary materials/MBNet_detections/improve_annotations_liu/test-all/annotations_KAIST_test_set/set06_V001_I00339.txt
- 3128 supplementary materials/MBNet_detections/improve_annotations_liu/test-all/annotations_KAIST_test_set/set06_V001_I00359.txt
- 3128 supplementary materials/MBNet_detections/improve_annotations_liu/test-all/annotations_KAIST_test_set/set06_V001_I00379.txt
- 3128 supplementary materials/MBNet_detections/improve_annotations_liu/test-all/annotations_KAIST_test_set/set06_V001_I00399.txt
- 3128 supplementary materials/MBNet_detections/improve_annotations_liu/test-all/annotations_KAIST_test_set/set06_V001_I00419.txt
- 3128 supplementary materials/MBNet_detections/improve_annotations_liu/test-all/annotations_KAIST_test_set/set06_V001_I00439.txt
- 3128 supplementary materials/MBNet_detections/improve_annotations_liu/test-all/annotations_KAIST_test_set/set06_V001_I00459.txt
- 3128 supplementary materials/MBNet_detections/improve_annotations_liu/test-all/annotations_KAIST_test_set/set06_V001_I00479.txt
- 3128 supplementary materials/MBNet_detections/improve_annotations_liu/test-all/annotations_KAIST_test_set/set06_V001_I00499.txt
- 3128 supplementary materials/MBNet_detections/improve_annotations_liu/test-all/annotations_KAIST_test_set/set06_V001_I00519.txt
- 3128 supplementary materials/MBNet_detections/improve_annotations_liu/test-all/annotations_KAIST_test_set/set06_V001_I00539.txt
- 3128 supplementary materials/MBNet_detections/improve_annotations_liu/test-all/annotations_KAIST_test_set/set06_V001_I00559.txt
- 3128 supplementary materials/MBNet_detections/improve_annotations_liu/test-all/annotations_KAIST_test_set/set06_V001_I00579.txt
- 3128 supplementary materials/MBNet_detections/improve_annotations_liu/test-all/annotations_KAIST_test_set/set06_V001_I00599.txt
- 3128 supplementary materials/MBNet_detections/improve_annotations_liu/test-all/annotations_KAIST_test_set/set06_V001_I00619.txt
- 3128 supplementary materials/MBNet_detections/improve_annotations_liu/test-all/annotations_KAIST_test_set/set06_V001_I00639.txt
- 3128 supplementary materials/MBNet_detections/improve_annotations_liu/test-all/annotations_KAIST_test_set/set06_V001_I00659.txt
- 3128 supplementary materials/MBNet_detections/improve_annotations_liu/test-all/annotations_KAIST_test_set/set06_V001_I00679.txt
- 3128 supplementary materials/MBNet_detections/improve_annotations_liu/test-all/annotations_KAIST_test_set/set06_V001_I00699.txt
- 3128 supplementary materials/MBNet_detections/improve_annotations_liu/test-all/annotations_KAIST_test_set/set06_V001_I00719.txt
- 3128 supplementary materials/MBNet_detections/improve_annotations_liu/test-all/annotations_KAIST_test_set/set06_V001_I00739.txt
- 3128 supplementary materials/MBNet_detections/improve_annotations_liu/test-all/annotations_KAIST_test_set/set06_V001_I00759.txt
- 3128 supplementary materials/MBNet_detections/improve_annotations_liu/test-all/annotations_KAIST_test_set/set06_V001_I00779.txt
- 3128 supplementary materials/MBNet_detections/improve_annotations_liu/test-all/annotations_KAIST_test_set/set06_V001_I00799.txt
- 3128 supplementary materials/MBNet_detections/improve_annotations_liu/test-all/annotations_KAIST_test_set/set06_V001_I00819.txt
- 3128 supplementary materials/MBNet_detections/improve_annotations_liu/test-all/annotations_KAIST_test_set/set06_V001_I00839.txt
- 3128 supplementary materials/MBNet_detections/improve_annotations_liu/test-all/annotations_KAIST_test_set/set06_V001_I00859.txt
- 3128 supplementary materials/MBNet_detections/improve_annotations_liu/test-all/annotations_KAIST_test_set/set06_V001_I00879.txt
- 3128 supplementary materials/MBNet_detections/improve_annotations_liu/test-all/annotations_KAIST_test_set/set06_V001_I00899.txt
- 3128 supplementary materials/MBNet_detections/improve_annotations_liu/test-all/annotations_KAIST_test_set/set06_V001_I00919.txt
- 3128 supplementary materials/MBNet_detections/improve_annotations_liu/test-all/annotations_KAIST_test_set/set06_V001_I00939.txt
- 3128 supplementary materials/MBNet_detections/improve_annotations_liu/test-all/annotations_KAIST_test_set/set06_V001_I00959.txt
- 3128 supplementary materials/MBNet_detections/improve_annotations_liu/test-all/annotations_KAIST_test_set/set06_V001_I00979.txt
- 3128 supplementary materials/MBNet_detections/improve_annotations_liu/test-all/annotations_KAIST_test_set/set06_V001_I00999.txt
- 3128 supplementary materials/MBNet_detections/improve_annotations_liu/test-all/annotations_KAIST_test_set/set06_V001_I01019.txt
- 3128 supplementary materials/MBNet_detections/improve_annotations_liu/test-all/annotations_KAIST_test_set/set06_V001_I01039.txt
- 3128 supplementary materials/MBNet_detections/improve_annotations_liu/test-all/annotations_KAIST_test_set/set06_V001_I01059.txt
- 3128 supplementary materials/MBNet_detections/improve_annotations_liu/test-all/annotations_KAIST_test_set/set06_V001_I01079.txt
- 3128 supplementary materials/MBNet_detections/improve_annotations_liu/test-all/annotations_KAIST_test_set/set06_V001_I01099.txt
- 3128 supplementary materials/MBNet_detections/improve_annotations_liu/test-all/annotations_KAIST_test_set/set06_V001_I01119.txt
- 3128 supplementary materials/MBNet_detections/improve_annotations_liu/test-all/annotations_KAIST_test_set/set06_V001_I01139.txt
- 3128 supplementary materials/MBNet_detections/improve_annotations_liu/test-all/annotations_KAIST_test_set/set06_V001_I01159.txt
- 3128 supplementary materials/MBNet_detections/improve_annotations_liu/test-all/annotations_KAIST_test_set/set06_V001_I01179.txt
- 3128 supplementary materials/MBNet_detections/improve_annotations_liu/test-all/annotations_KAIST_test_set/set06_V001_I01199.txt
- 3128 supplementary materials/MBNet_detections/improve_annotations_liu/test-all/annotations_KAIST_test_set/set06_V001_I01219.txt
- 3128 supplementary materials/MBNet_detections/improve_annotations_liu/test-all/annotations_KAIST_test_set/set06_V001_I01239.txt
- 3128 supplementary materials/MBNet_detections/improve_annotations_liu/test-all/annotations_KAIST_test_set/set06_V001_I01259.txt
- 3128 supplementary materials/MBNet_detections/improve_annotations_liu/test-all/annotations_KAIST_test_set/set06_V001_I01279.txt
- 3128 supplementary materials/MBNet_detections/improve_annotations_liu/test-all/annotations_KAIST_test_set/set06_V001_I01299.txt
- 3128 supplementary materials/MBNet_detections/improve_annotations_liu/test-all/annotations_KAIST_test_set/set06_V001_I01319.txt
- 3128 supplementary materials/MBNet_detections/improve_annotations_liu/test-all/annotations_KAIST_test_set/set06_V001_I01339.txt
- 3128 supplementary materials/MBNet_detections/improve_annotations_liu/test-all/annotations_KAIST_test_set/set06_V001_I01359.txt
- 3128 supplementary materials/MBNet_detections/improve_annotations_liu/test-all/annotations_KAIST_test_set/set06_V001_I01379.txt
- 3128 supplementary materials/MBNet_detections/improve_annotations_liu/test-all/annotations_KAIST_test_set/set06_V001_I01399.txt
- 3128 supplementary materials/MBNet_detections/improve_annotations_liu/test-all/annotations_KAIST_test_set/set06_V001_I01419.txt
- 3128 supplementary materials/MBNet_detections/improve_annotations_liu/test-all/annotations_KAIST_test_set/set06_V001_I01439.txt
- 3128 supplementary materials/MBNet_detections/improve_annotations_liu/test-all/annotations_KAIST_test_set/set06_V001_I01459.txt
- 3128 supplementary materials/MBNet_detections/improve_annotations_liu/test-all/annotations_KAIST_test_set/set06_V001_I01479.txt
- 3128 supplementary materials/MBNet_detections/improve_annotations_liu/test-all/annotations_KAIST_test_set/set06_V001_I01499.txt
- 3128 supplementary materials/MBNet_detections/improve_annotations_liu/test-all/annotations_KAIST_test_set/set06_V001_I01519.txt
- 3128 supplementary materials/MBNet_detections/improve_annotations_liu/test-all/annotations_KAIST_test_set/set06_V001_I01539.txt
- 3128 supplementary materials/MBNet_detections/improve_annotations_liu/test-all/annotations_KAIST_test_set/set06_V001_I01559.txt
- 3128 supplementary materials/MBNet_detections/improve_annotations_liu/test-all/annotations_KAIST_test_set/set06_V001_I01579.txt
- 3128 supplementary materials/MBNet_detections/improve_annotations_liu/test-all/annotations_KAIST_test_set/set06_V001_I01599.txt
- 3128 supplementary materials/MBNet_detections/improve_annotations_liu/test-all/annotations_KAIST_test_set/set06_V001_I01619.txt
- 3128 supplementary materials/MBNet_detections/improve_annotations_liu/test-all/annotations_KAIST_test_set/set06_V001_I01639.txt
- 3128 supplementary materials/MBNet_detections/improve_annotations_liu/test-all/annotations_KAIST_test_set/set06_V001_I01659.txt
- 3128 supplementary materials/MBNet_detections/improve_annotations_liu/test-all/annotations_KAIST_test_set/set06_V001_I01679.txt
- 3128 supplementary materials/MBNet_detections/improve_annotations_liu/test-all/annotations_KAIST_test_set/set06_V001_I01699.txt
- 3128 supplementary materials/MBNet_detections/improve_annotations_liu/test-all/annotations_KAIST_test_set/set06_V001_I01719.txt
- 3128 supplementary materials/MBNet_detections/improve_annotations_liu/test-all/annotations_KAIST_test_set/set06_V001_I01739.txt
- 3128 supplementary materials/MBNet_detections/improve_annotations_liu/test-all/annotations_KAIST_test_set/set06_V001_I01759.txt
- 3128 supplementary materials/MBNet_detections/improve_annotations_liu/test-all/annotations_KAIST_test_set/set06_V001_I01779.txt
- 3128 supplementary materials/MBNet_detections/improve_annotations_liu/test-all/annotations_KAIST_test_set/set06_V001_I01799.txt
- 3128 supplementary materials/MBNet_detections/improve_annotations_liu/test-all/annotations_KAIST_test_set/set06_V001_I01819.txt
- 3128 supplementary materials/MBNet_detections/improve_annotations_liu/test-all/annotations_KAIST_test_set/set06_V001_I01839.txt
- 3128 supplementary materials/MBNet_detections/improve_annotations_liu/test-all/annotations_KAIST_test_set/set06_V001_I01859.txt
- 3128 supplementary materials/MBNet_detections/improve_annotations_liu/test-all/annotations_KAIST_test_set/set06_V001_I01879.txt
- 3128 supplementary materials/MBNet_detections/improve_annotations_liu/test-all/annotations_KAIST_test_set/set06_V001_I01899.txt
- 3128 supplementary materials/MBNet_detections/improve_annotations_liu/test-all/annotations_KAIST_test_set/set06_V001_I01919.txt
- 3128 supplementary materials/MBNet_detections/improve_annotations_liu/test-all/annotations_KAIST_test_set/set06_V001_I01939.txt
- 3128 supplementary materials/MBNet_detections/improve_annotations_liu/test-all/annotations_KAIST_test_set/set06_V001_I01959.txt
- 3128 supplementary materials/MBNet_detections/improve_annotations_liu/test-all/annotations_KAIST_test_set/set06_V001_I01979.txt
- 3128 supplementary materials/MBNet_detections/improve_annotations_liu/test-all/annotations_KAIST_test_set/set06_V001_I01999.txt
- 3128 supplementary materials/MBNet_detections/improve_annotations_liu/test-all/annotations_KAIST_test_set/set06_V001_I02019.txt
- 3128 supplementary materials/MBNet_detections/improve_annotations_liu/test-all/annotations_KAIST_test_set/set06_V001_I02039.txt
- 3128 supplementary materials/MBNet_detections/improve_annotations_liu/test-all/annotations_KAIST_test_set/set06_V001_I02059.txt
- 3128 supplementary materials/MBNet_detections/improve_annotations_liu/test-all/annotations_KAIST_test_set/set06_V001_I02079.txt
- 3128 supplementary materials/MBNet_detections/improve_annotations_liu/test-all/annotations_KAIST_test_set/set06_V001_I02099.txt
- 3128 supplementary materials/MBNet_detections/improve_annotations_liu/test-all/annotations_KAIST_test_set/set06_V001_I02119.txt
- 3128 supplementary materials/MBNet_detections/improve_annotations_liu/test-all/annotations_KAIST_test_set/set06_V001_I02139.txt
- 3128 supplementary materials/MBNet_detections/improve_annotations_liu/test-all/annotations_KAIST_test_set/set06_V001_I02159.txt
- 3128 supplementary materials/MBNet_detections/improve_annotations_liu/test-all/annotations_KAIST_test_set/set06_V001_I02179.txt
- 3128 supplementary materials/MBNet_detections/improve_annotations_liu/test-all/annotations_KAIST_test_set/set06_V001_I02199.txt
- 3128 supplementary materials/MBNet_detections/improve_annotations_liu/test-all/annotations_KAIST_test_set/set06_V001_I02219.txt
- 3128 supplementary materials/MBNet_detections/improve_annotations_liu/test-all/annotations_KAIST_test_set/set06_V001_I02239.txt
- 3128 supplementary materials/MBNet_detections/improve_annotations_liu/test-all/annotations_KAIST_test_set/set06_V001_I02259.txt
- 3128 supplementary materials/MBNet_detections/improve_annotations_liu/test-all/annotations_KAIST_test_set/set06_V001_I02279.txt
- 3128 supplementary materials/MBNet_detections/improve_annotations_liu/test-all/annotations_KAIST_test_set/set06_V001_I02299.txt
- 3128 supplementary materials/MBNet_detections/improve_annotations_liu/test-all/annotations_KAIST_test_set/set06_V001_I02319.txt
- 3128 supplementary materials/MBNet_detections/improve_annotations_liu/test-all/annotations_KAIST_test_set/set06_V001_I02339.txt
- 3128 supplementary materials/MBNet_detections/improve_annotations_liu/test-all/annotations_KAIST_test_set/set06_V001_I02359.txt
- 3128 supplementary materials/MBNet_detections/improve_annotations_liu/test-all/annotations_KAIST_test_set/set06_V001_I02379.txt
- 3128 supplementary materials/MBNet_detections/improve_annotations_liu/test-all/annotations_KAIST_test_set/set06_V001_I02399.txt
- 3128 supplementary materials/MBNet_detections/improve_annotations_liu/test-all/annotations_KAIST_test_set/set06_V001_I02419.txt
- 3128 supplementary materials/MBNet_detections/improve_annotations_liu/test-all/annotations_KAIST_test_set/set06_V001_I02439.txt
- 3128 supplementary materials/MBNet_detections/improve_annotations_liu/test-all/annotations_KAIST_test_set/set06_V001_I02459.txt
- 3128 supplementary materials/MBNet_detections/improve_annotations_liu/test-all/annotations_KAIST_test_set/set06_V001_I02479.txt
- 3128 supplementary materials/MBNet_detections/improve_annotations_liu/test-all/annotations_KAIST_test_set/set06_V001_I02499.txt
- 3128 supplementary materials/MBNet_detections/improve_annotations_liu/test-all/annotations_KAIST_test_set/set06_V001_I02519.txt
- 3128 supplementary materials/MBNet_detections/improve_annotations_liu/test-all/annotations_KAIST_test_set/set06_V001_I02539.txt
- 3128 supplementary materials/MBNet_detections/improve_annotations_liu/test-all/annotations_KAIST_test_set/set06_V001_I02559.txt
- 3128 supplementary materials/MBNet_detections/improve_annotations_liu/test-all/annotations_KAIST_test_set/set06_V001_I02579.txt
- 3128 supplementary materials/MBNet_detections/improve_annotations_liu/test-all/annotations_KAIST_test_set/set06_V001_I02599.txt
- 3128 supplementary materials/MBNet_detections/improve_annotations_liu/test-all/annotations_KAIST_test_set/set06_V001_I02619.txt
- 3128 supplementary materials/MBNet_detections/improve_annotations_liu/test-all/annotations_KAIST_test_set/set06_V001_I02639.txt
- 3128 supplementary materials/MBNet_detections/improve_annotations_liu/test-all/annotations_KAIST_test_set/set06_V001_I02659.txt
- 3128 supplementary materials/MBNet_detections/improve_annotations_liu/test-all/annotations_KAIST_test_set/set06_V001_I02679.txt
- 3128 supplementary materials/MBNet_detections/improve_annotations_liu/test-all/annotations_KAIST_test_set/set06_V002_I00019.txt
- 3128 supplementary materials/MBNet_detections/improve_annotations_liu/test-all/annotations_KAIST_test_set/set06_V002_I00039.txt
- 3128 supplementary materials/MBNet_detections/improve_annotations_liu/test-all/annotations_KAIST_test_set/set06_V002_I00059.txt
- 3128 supplementary materials/MBNet_detections/improve_annotations_liu/test-all/annotations_KAIST_test_set/set06_V002_I00079.txt
- 3128 supplementary materials/MBNet_detections/improve_annotations_liu/test-all/annotations_KAIST_test_set/set06_V002_I00099.txt
- 3128 supplementary materials/MBNet_detections/improve_annotations_liu/test-all/annotations_KAIST_test_set/set06_V002_I00119.txt
- 3128 supplementary materials/MBNet_detections/improve_annotations_liu/test-all/annotations_KAIST_test_set/set06_V002_I00139.txt
- 3128 supplementary materials/MBNet_detections/improve_annotations_liu/test-all/annotations_KAIST_test_set/set06_V002_I00159.txt
- 3128 supplementary materials/MBNet_detections/improve_annotations_liu/test-all/annotations_KAIST_test_set/set06_V002_I00179.txt
- 3128 supplementary materials/MBNet_detections/improve_annotations_liu/test-all/annotations_KAIST_test_set/set06_V002_I00199.txt
- 3128 supplementary materials/MBNet_detections/improve_annotations_liu/test-all/annotations_KAIST_test_set/set06_V002_I00219.txt
- 3128 supplementary materials/MBNet_detections/improve_annotations_liu/test-all/annotations_KAIST_test_set/set06_V002_I00239.txt
- 3128 supplementary materials/MBNet_detections/improve_annotations_liu/test-all/annotations_KAIST_test_set/set06_V002_I00259.txt
- 3128 supplementary materials/MBNet_detections/improve_annotations_liu/test-all/annotations_KAIST_test_set/set06_V002_I00279.txt
- 3128 supplementary materials/MBNet_detections/improve_annotations_liu/test-all/annotations_KAIST_test_set/set06_V002_I00299.txt
- 3128 supplementary materials/MBNet_detections/improve_annotations_liu/test-all/annotations_KAIST_test_set/set06_V002_I00319.txt
- 3128 supplementary materials/MBNet_detections/improve_annotations_liu/test-all/annotations_KAIST_test_set/set06_V002_I00339.txt
- 3128 supplementary materials/MBNet_detections/improve_annotations_liu/test-all/annotations_KAIST_test_set/set06_V002_I00359.txt
- 3128 supplementary materials/MBNet_detections/improve_annotations_liu/test-all/annotations_KAIST_test_set/set06_V002_I00379.txt
- 3128 supplementary materials/MBNet_detections/improve_annotations_liu/test-all/annotations_KAIST_test_set/set06_V002_I00399.txt
- 3128 supplementary materials/MBNet_detections/improve_annotations_liu/test-all/annotations_KAIST_test_set/set06_V002_I00419.txt
- 3128 supplementary materials/MBNet_detections/improve_annotations_liu/test-all/annotations_KAIST_test_set/set06_V002_I00439.txt
- 3128 supplementary materials/MBNet_detections/improve_annotations_liu/test-all/annotations_KAIST_test_set/set06_V002_I00459.txt
- 3128 supplementary materials/MBNet_detections/improve_annotations_liu/test-all/annotations_KAIST_test_set/set06_V002_I00479.txt
- 3128 supplementary materials/MBNet_detections/improve_annotations_liu/test-all/annotations_KAIST_test_set/set06_V002_I00499.txt
- 3128 supplementary materials/MBNet_detections/improve_annotations_liu/test-all/annotations_KAIST_test_set/set06_V002_I00519.txt
- 3128 supplementary materials/MBNet_detections/improve_annotations_liu/test-all/annotations_KAIST_test_set/set06_V002_I00539.txt
- 3128 supplementary materials/MBNet_detections/improve_annotations_liu/test-all/annotations_KAIST_test_set/set06_V002_I00559.txt
- 3128 supplementary materials/MBNet_detections/improve_annotations_liu/test-all/annotations_KAIST_test_set/set06_V002_I00579.txt
- 3128 supplementary materials/MBNet_detections/improve_annotations_liu/test-all/annotations_KAIST_test_set/set06_V002_I00599.txt
- 3128 supplementary materials/MBNet_detections/improve_annotations_liu/test-all/annotations_KAIST_test_set/set06_V002_I00619.txt
- 3128 supplementary materials/MBNet_detections/improve_annotations_liu/test-all/annotations_KAIST_test_set/set06_V002_I00639.txt
- 3128 supplementary materials/MBNet_detections/improve_annotations_liu/test-all/annotations_KAIST_test_set/set06_V002_I00659.txt
- 3128 supplementary materials/MBNet_detections/improve_annotations_liu/test-all/annotations_KAIST_test_set/set06_V002_I00679.txt
- 3128 supplementary materials/MBNet_detections/improve_annotations_liu/test-all/annotations_KAIST_test_set/set06_V002_I00699.txt
- 3128 supplementary materials/MBNet_detections/improve_annotations_liu/test-all/annotations_KAIST_test_set/set06_V002_I00719.txt
- 3128 supplementary materials/MBNet_detections/improve_annotations_liu/test-all/annotations_KAIST_test_set/set06_V002_I00739.txt
- 3128 supplementary materials/MBNet_detections/improve_annotations_liu/test-all/annotations_KAIST_test_set/set06_V002_I00759.txt
- 3128 supplementary materials/MBNet_detections/improve_annotations_liu/test-all/annotations_KAIST_test_set/set06_V002_I00779.txt
- 3128 supplementary materials/MBNet_detections/improve_annotations_liu/test-all/annotations_KAIST_test_set/set06_V002_I00799.txt
- 3128 supplementary materials/MBNet_detections/improve_annotations_liu/test-all/annotations_KAIST_test_set/set06_V002_I00819.txt
- 3128 supplementary materials/MBNet_detections/improve_annotations_liu/test-all/annotations_KAIST_test_set/set06_V002_I00839.txt
- 3128 supplementary materials/MBNet_detections/improve_annotations_liu/test-all/annotations_KAIST_test_set/set06_V002_I00859.txt
- 3128 supplementary materials/MBNet_detections/improve_annotations_liu/test-all/annotations_KAIST_test_set/set06_V002_I00879.txt
- 3128 supplementary materials/MBNet_detections/improve_annotations_liu/test-all/annotations_KAIST_test_set/set06_V002_I00899.txt
- 3128 supplementary materials/MBNet_detections/improve_annotations_liu/test-all/annotations_KAIST_test_set/set06_V002_I00919.txt
- 3128 supplementary materials/MBNet_detections/improve_annotations_liu/test-all/annotations_KAIST_test_set/set06_V002_I00939.txt
- 3128 supplementary materials/MBNet_detections/improve_annotations_liu/test-all/annotations_KAIST_test_set/set06_V002_I00959.txt
- 3128 supplementary materials/MBNet_detections/improve_annotations_liu/test-all/annotations_KAIST_test_set/set06_V002_I00979.txt
- 3128 supplementary materials/MBNet_detections/improve_annotations_liu/test-all/annotations_KAIST_test_set/set06_V002_I00999.txt
- 3128 supplementary materials/MBNet_detections/improve_annotations_liu/test-all/annotations_KAIST_test_set/set06_V002_I01019.txt
- 3128 supplementary materials/MBNet_detections/improve_annotations_liu/test-all/annotations_KAIST_test_set/set06_V002_I01039.txt
- 3128 supplementary materials/MBNet_detections/improve_annotations_liu/test-all/annotations_KAIST_test_set/set06_V002_I01059.txt
- 3128 supplementary materials/MBNet_detections/improve_annotations_liu/test-all/annotations_KAIST_test_set/set06_V002_I01079.txt
- 3128 supplementary materials/MBNet_detections/improve_annotations_liu/test-all/annotations_KAIST_test_set/set06_V002_I01099.txt
- 3128 supplementary materials/MBNet_detections/improve_annotations_liu/test-all/annotations_KAIST_test_set/set06_V002_I01119.txt
- 3128 supplementary materials/MBNet_detections/improve_annotations_liu/test-all/annotations_KAIST_test_set/set06_V002_I01139.txt
- 3128 supplementary materials/MBNet_detections/improve_annotations_liu/test-all/annotations_KAIST_test_set/set06_V002_I01159.txt
- 3128 supplementary materials/MBNet_detections/improve_annotations_liu/test-all/annotations_KAIST_test_set/set06_V002_I01179.txt
- 3128 supplementary materials/MBNet_detections/improve_annotations_liu/test-all/annotations_KAIST_test_set/set06_V002_I01199.txt
- 3128 supplementary materials/MBNet_detections/improve_annotations_liu/test-all/annotations_KAIST_test_set/set06_V002_I01219.txt
- 3128 supplementary materials/MBNet_detections/improve_annotations_liu/test-all/annotations_KAIST_test_set/set06_V002_I01239.txt
- 3128 supplementary materials/MBNet_detections/improve_annotations_liu/test-all/annotations_KAIST_test_set/set06_V002_I01259.txt
- 3128 supplementary materials/MBNet_detections/improve_annotations_liu/test-all/annotations_KAIST_test_set/set06_V002_I01279.txt
- 3128 supplementary materials/MBNet_detections/improve_annotations_liu/test-all/annotations_KAIST_test_set/set06_V002_I01299.txt
- 3128 supplementary materials/MBNet_detections/improve_annotations_liu/test-all/annotations_KAIST_test_set/set06_V002_I01319.txt
- 3128 supplementary materials/MBNet_detections/improve_annotations_liu/test-all/annotations_KAIST_test_set/set06_V002_I01339.txt
- 3128 supplementary materials/MBNet_detections/improve_annotations_liu/test-all/annotations_KAIST_test_set/set06_V002_I01359.txt
- 3128 supplementary materials/MBNet_detections/improve_annotations_liu/test-all/annotations_KAIST_test_set/set06_V002_I01379.txt
- 3128 supplementary materials/MBNet_detections/improve_annotations_liu/test-all/annotations_KAIST_test_set/set06_V002_I01399.txt
[truncated: 8,769 more entries]
