# Supplementary material
Source: ML conference proceedings conference paper supplement (https://www.ecva.net/papers/eccv_2020/papers_ECCV/html/123630766_ECCV_2020_paper.php)
Supplement: Supplementary file 2 [file 123630766-supp.zip › 3128 supplementary materials/MBNet_detections/improve_annotations_liu/test-all/annotations_KAIST_test_set/set06_V000_I01499.txt]

% bbGt version=3
person 519 226 28 66 0 0 0 0 0 0 0
person 592 235 20 48 0 0 0 0 0 0 0
person 541 231 23 54 0 0 0 0 0 0 0
