# Supplementary material
Source: ML conference proceedings conference paper supplement (https://www.ecva.net/papers/eccv_2020/papers_ECCV/html/123630766_ECCV_2020_paper.php)
Supplement: Supplementary file 2 [file 123630766-supp.zip › 3128 supplementary materials/MBNet_detections/improve_annotations_liu/test-all/annotations_KAIST_test_set/set06_V001_I00299.txt]

% bbGt version=3
person 470 221 26 48 0 0 0 0 0 0 0
people 335 203 42 30 0 0 0 0 0 0 0
person 298 201 18 27 0 0 0 0 0 0 0
person? 209 203 14 21 0 0 0 0 0 0 0
person 442 221 17 38 0 0 0 0 0 0 0
person 453 219 18 46 0 0 0 0 0 0 0
