# Supplementary material
Source: ML conference proceedings conference paper supplement (https://www.ecva.net/papers/eccv_2020/papers_ECCV/html/123630766_ECCV_2020_paper.php)
Supplement: Supplementary file 2 [file 123630766-supp.zip › 3128 supplementary materials/MBNet_detections/improve_annotations_liu/test-all/annotations_KAIST_test_set/set06_V001_I00339.txt]

% bbGt version=3
person 575 217 37 85 0 0 0 0 0 0 0
person 607 223 21 58 0 0 0 0 0 0 0
person 552 223 17 47 0 0 0 0 0 0 0
people 353 200 44 34 0 0 0 0 0 0 0
person 305 196 17 35 0 0 0 0 0 0 0
person? 190 180 16 27 0 0 0 0 0 0 0
