# Supplementary material
Source: ML conference proceedings conference paper supplement (https://www.ecva.net/papers/eccv_2020/papers_ECCV/html/123630766_ECCV_2020_paper.php)
Supplement: Supplementary file 2 [file 123630766-supp.zip › 3128 supplementary materials/MBNet_detections/improve_annotations_liu/test-all/annotations_KAIST_test_set/set06_V001_I00359.txt]

% bbGt version=3
person 541 215 31 73 0 0 0 0 0 0 0
person 561 219 32 73 0 0 0 0 0 0 0
person 385 201 16 38 0 0 0 0 0 0 0
person 360 202 18 38 0 0 0 0 0 0 0
person 371 199 16 40 0 0 0 0 0 0 0
person 305 191 22 43 0 0 0 0 0 0 0
person 172 169 20 31 0 0 0 0 0 0 0
