# Supplementary material
Source: ML conference proceedings conference paper supplement (https://www.ecva.net/papers/eccv_2020/papers_ECCV/html/123630766_ECCV_2020_paper.php)
Supplement: Supplementary file 2 [file 123630766-supp.zip › 3128 supplementary materials/MBNet_detections/improve_annotations_liu/test-all/annotations_KAIST_test_set/set06_V001_I00379.txt]

% bbGt version=3
person 549 216 36 88 0 0 0 0 0 0 0
person 579 218 33 85 0 0 0 0 0 0 0
person 611 229 29 53 0 0 0 0 0 0 0
person 335 201 22 46 0 0 0 0 0 0 0
person 347 198 24 49 0 0 0 0 0 0 0
person 362 198 24 48 0 0 0 0 0 0 0
person 274 188 22 45 0 0 0 0 0 0 0
person? 118 157 18 34 0 0 0 0 0 0 0
person 431 220 23 41 0 0 0 0 0 0 0
