# Supplementary material
Source: ML conference proceedings conference paper supplement (https://www.ecva.net/papers/eccv_2020/papers_ECCV/html/123630766_ECCV_2020_paper.php)
Supplement: Supplementary file 2 [file 123630766-supp.zip › 3128 supplementary materials/MBNet_detections/improve_annotations_liu/test-all/annotations_KAIST_test_set/set06_V001_I00399.txt]

% bbGt version=3
person 516 213 46 99 0 0 0 0 0 0 0
person 550 215 35 92 0 0 0 0 0 0 0
person 198 186 27 52 0 0 0 0 0 0 0
person 259 202 29 57 0 0 0 0 0 0 0
person 297 203 29 50 0 0 0 0 0 0 0
person 279 202 27 57 0 0 0 0 0 0 0
person 586 222 32 60 0 0 0 0 0 0 0
person? 16 144 39 34 0 0 0 0 0 0 0
person 378 219 26 51 0 0 0 0 0 0 0
