# Supplementary material
Source: ML conference proceedings conference paper supplement (https://www.ecva.net/papers/eccv_2020/papers_ECCV/html/123630766_ECCV_2020_paper.php)
Supplement: Supplementary file 2 [file 123630766-supp.zip › 3128 supplementary materials/MBNet_detections/improve_annotations_liu/test-all/annotations_KAIST_test_set/set06_V001_I00419.txt]

% bbGt version=3
person 440 213 45 101 0 0 0 0 0 0 0
person 473 213 37 97 0 0 0 0 0 0 0
person 101 189 31 60 0 0 0 0 0 0 0
person 176 212 32 67 0 0 0 0 0 0 0
person 216 209 32 57 0 0 0 0 0 0 0
person 194 209 29 64 0 0 0 0 0 0 0
person 528 220 29 62 0 0 0 0 0 0 0
person 301 216 25 55 0 0 0 0 0 0 0
person 600 210 26 46 1 0 0 0 0 0 0
