# Supplementary material
Source: ML conference proceedings conference paper supplement (https://www.ecva.net/papers/eccv_2020/papers_ECCV/html/123630766_ECCV_2020_paper.php)
Supplement: Supplementary file 2 [file 123630766-supp.zip › 3128 supplementary materials/MBNet_detections/improve_annotations_liu/test-all/annotations_KAIST_test_set/set06_V001_I00439.txt]

% bbGt version=3
person 346 212 55 105 0 0 0 0 0 0 0
person 392 215 40 95 0 0 0 0 0 0 0
person 12 190 40 74 0 0 0 0 0 0 0
person 102 214 36 76 0 0 0 0 0 0 0
person 149 213 33 71 0 0 0 0 0 0 0
person 123 216 30 68 0 0 0 0 0 0 0
person 464 221 35 64 0 0 0 0 0 0 0
person 215 217 30 64 0 0 0 0 0 0 0
person 550 205 29 57 0 0 0 0 0 0 0
