# Supplementary material
Source: ML conference proceedings conference paper supplement (https://www.ecva.net/papers/eccv_2020/papers_ECCV/html/123630766_ECCV_2020_paper.php)
Supplement: Supplementary file 2 [file 123630766-supp.zip › 3128 supplementary materials/MBNet_detections/improve_annotations_liu/test-all/annotations_KAIST_test_set/set06_V001_I00459.txt]

% bbGt version=3
person 282 209 52 111 0 0 0 0 0 0 0
person 331 213 43 103 0 0 0 0 0 0 0
person 54 211 30 80 0 0 0 0 0 0 0
person 106 212 33 77 0 0 0 0 0 0 0
person 78 213 28 77 0 0 0 0 0 0 0
person 587 232 49 110 0 0 0 0 0 0 0
person 421 222 30 65 0 0 0 0 0 0 0
person 163 215 31 72 0 0 0 0 0 0 0
