# Supplementary material
Source: ML conference proceedings conference paper supplement (https://www.ecva.net/papers/eccv_2020/papers_ECCV/html/123630766_ECCV_2020_paper.php)
Supplement: Supplementary file 2 [file 123630766-supp.zip › 3128 supplementary materials/MBNet_detections/improve_annotations_liu/test-all/annotations_KAIST_test_set/set06_V001_I00479.txt]

% bbGt version=3
person 256 211 42 110 0 0 0 0 0 0 0
person 286 211 45 110 0 0 0 0 0 0 0
person 48 206 38 88 0 0 0 0 0 0 0
person 106 212 33 77 0 0 0 0 0 0 0
person 74 207 35 86 0 0 0 0 0 0 0
person 535 230 46 110 0 0 0 0 0 0 0
person 403 223 29 59 0 0 0 0 0 0 0
person 140 222 31 62 0 0 0 0 0 0 0
