# Supplementary material
Source: ML conference proceedings conference paper supplement (https://www.ecva.net/papers/eccv_2020/papers_ECCV/html/123630766_ECCV_2020_paper.php)
Supplement: Supplementary file 2 [file 123630766-supp.zip › 3128 supplementary materials/MBNet_detections/improve_annotations_liu/test-all/annotations_KAIST_test_set/set06_V001_I00499.txt]

% bbGt version=3
person 238 219 40 96 0 0 0 0 0 0 0
person 269 217 39 92 0 0 0 0 0 0 0
person 66 212 39 84 0 0 0 0 0 0 0
person 128 219 35 75 0 0 0 0 0 0 0
person 91 213 32 80 0 0 0 0 0 0 0
person 501 225 43 99 0 0 0 0 0 0 0
person 403 217 36 67 0 0 0 0 0 0 0
person 142 224 29 67 0 0 0 0 0 0 0
person 468 208 30 65 0 0 0 0 0 0 0
