# Supplementary material
Source: ML conference proceedings conference paper supplement (https://www.ecva.net/papers/eccv_2020/papers_ECCV/html/123630766_ECCV_2020_paper.php)
Supplement: Supplementary file 2 [file 123630766-supp.zip › 3128 supplementary materials/MBNet_detections/improve_annotations_liu/test-all/annotations_KAIST_test_set/set06_V001_I00519.txt]

% bbGt version=3
person 215 220 45 89 0 0 0 0 0 0 0
person 246 213 41 98 0 0 0 0 0 0 0
person 84 214 41 95 0 0 0 0 0 0 0
person 147 214 35 88 0 0 0 0 0 0 0
person 110 209 36 91 0 0 0 0 0 0 0
person 538 235 58 186 0 0 0 0 0 0 0
person 475 219 42 101 0 0 0 0 0 0 0
person 420 218 35 64 0 0 0 0 0 0 0
person 140 225 33 73 0 0 0 0 0 0 0
person 454 206 26 61 0 0 0 0 0 0 0
