# Supplementary material
Source: ML conference proceedings conference paper supplement (https://www.ecva.net/papers/eccv_2020/papers_ECCV/html/123630766_ECCV_2020_paper.php)
Supplement: Supplementary file 2 [file 123630766-supp.zip › 3128 supplementary materials/MBNet_detections/improve_annotations_liu/test-all/annotations_KAIST_test_set/set06_V001_I00539.txt]

% bbGt version=3
person 211 213 39 93 0 0 0 0 0 0 0
person 194 220 36 82 0 0 0 0 0 0 0
person 103 213 40 101 0 0 0 0 0 0 0
person 164 220 35 85 0 0 0 0 0 0 0
person 125 214 35 98 0 0 0 0 0 0 0
person 464 240 62 164 0 0 0 0 0 0 0
person 445 229 34 80 0 0 0 0 0 0 0
person 433 220 25 60 0 0 0 0 0 0 0
