# Supplementary material
Source: ML conference proceedings conference paper supplement (https://www.ecva.net/papers/eccv_2020/papers_ECCV/html/123630766_ECCV_2020_paper.php)
Supplement: Supplementary file 2 [file 123630766-supp.zip › 3128 supplementary materials/MBNet_detections/improve_annotations_liu/test-all/annotations_KAIST_test_set/set06_V001_I00559.txt]

% bbGt version=3
person 92 218 50 101 0 0 0 0 0 0 0
person 150 214 39 110 0 0 0 0 0 0 0
person 117 212 40 115 0 0 0 0 0 0 0
person 401 234 60 161 0 0 0 0 0 0 0
person 398 226 37 88 0 0 0 0 0 0 0
