# Supplementary material
Source: ML conference proceedings conference paper supplement (https://www.ecva.net/papers/eccv_2020/papers_ECCV/html/123630766_ECCV_2020_paper.php)
Supplement: Supplementary file 2 [file 123630766-supp.zip › 3128 supplementary materials/MBNet_detections/improve_annotations_liu/test-all/annotations_KAIST_test_set/set06_V001_I00579.txt]

% bbGt version=3
person 19 213 51 131 0 0 0 0 0 0 0
person 108 210 46 122 0 0 0 0 0 0 0
person 65 211 55 124 0 0 0 0 0 0 0
person 305 225 72 171 0 0 0 0 0 0 0
person 338 214 35 67 0 0 0 0 0 0 0
people 2 212 44 83 0 0 0 0 0 0 0
person 383 212 33 65 0 0 0 0 0 0 0
